# Supplementary material for: Novel Haplotype in the HHEX Gene Promoter Associated with Body Length in Pigs
Source: MDPI journal article supplement (doi:10.3390/genes14020511), 2023-02-17
Supplement: s1 [file s1]

**Table S4.** Analysis of the transcription factor-binding sites of the SNP rs80901185T>C in the promoter sequence of the porcine *HHEX* gene.

| TF         | SEQUENCE           | SCORE          | Q-VALUE        | MATCHED SEQUENCE                      |
|------------|--------------------|----------------|----------------|---------------------------------------|
| ZBTB17     | rs80901185T        | 10.1667        | 0.00684        | <b>TCGCTTGAATCCGCCTTCC</b>            |
| POLR2A     | rs80901185C        | 10.7632        | 0.00216        | GTGTTCCCACCGGGGCTACAG <u>CC</u>       |
| CDK9       | rs80901185C        | 8.38158        | 0.00452        | TGTTCCCACCGGGGCTACAG <u>CC</u>        |
| POLR2A     | rs80901185C        | 8.40789        | 0.00588        | TGTTCCCACCGGGGCTACAG <u>CC</u>        |
| TAF1       | rs80901185C        | 11.8158        | 0.000828       | GTTCCCACCGGGGCTACAG <u>CC</u>         |
| TAF1       | rs80901185C        | 12.0263        | 0.00123        | TTCCCACCGGGGCTACAG <u>CC</u> CGC      |
| TBP        | rs80901185C        | 9.09639        | 0.00558        | TCCCACCGGGGCTACAG <u>CC</u> CGCT      |
| EP300      | rs80901185C        | -1.44286       | 0.00414        | CCCACCGGGGCTACAG <u>CC</u> CGC        |
| <b>YY1</b> | <b>rs80901185C</b> | <b>6.93421</b> | <b>0.00275</b> | <b>CCACCGGGGCTACAG<u>CC</u>CGCTTG</b> |
| TBP        | rs80901185C        | 11.0921        | 0.00272        | CACCGGGGCTACAG <u>CC</u> CGCTTGA      |
| <b>YY1</b> | <b>rs80901185C</b> | <b>8.68421</b> | <b>0.00637</b> | <b>CACCGGGGCTACAG<u>CC</u></b>        |
| TAF1       | rs80901185C        | 12.5263        | 0.000834       | CCGGGGCTACAG <u>CC</u> CGC            |
| <b>YY1</b> | <b>rs80901185C</b> | <b>9.68421</b> | <b>0.0025</b>  | <b>CCGGGGCTACAG<u>CC</u>CGC</b>       |
| SUZ12      | rs80901185C        | 10.2237        | 0.00345        | CCGGGGCTACAG <u>CC</u> CGC            |
| POLR2A     | rs80901185C        | 9.23684        | 0.00618        | CCGGGGCTACAG <u>CC</u> CGC            |
| POLR2A     | rs80901185C        | 9.57895        | 0.00538        | CGGGGCTACAG <u>CC</u> CGCT            |
| ZNF589     | rs80901185C        | 11.0198        | 0.00305        | GGGCTACAG <u>CC</u> CGCTTG            |
| POLR2A     | rs80901185C        | 10.2632        | 0.00456        | GCTACAG <u>CC</u> CGCT                |
| STAT3      | rs80901185C        | 15.1714        | 0.000282       | CTACAG <u>CC</u> CGCTTGAATCCGCCT      |
| SPI1       | rs80901185C        | 8.84286        | 0.0061         | AG <u>CC</u> CGCTTGAATCCGCCTTCCAGGC   |

The mutation sites are highlighted in bold and underlined.
