# Supplementary material for: Novel Haplotype in the HHEX Gene Promoter Associated with Body Length in Pigs
Source: MDPI journal article supplement (doi:10.3390/genes14020511), 2023-02-17
Supplement: s1 [file s1]

**Table S2.** Primer information of SNP identification and RACE for porcine *HHEX* gene.

| Primer                | Primer sequence (5'-3')                             | Product Size (bp) | Tm (°C) | Usage                      |
|-----------------------|-----------------------------------------------------|-------------------|---------|----------------------------|
| <i>HHEX</i> -pro-1k-1 | F: CTTAGCAGAAACCGCTCACC<br>R: AGGCGTGAGGCAAGCAG     | 736               | 60      | Promote<br>r region<br>PCR |
| <i>HHEX</i> -pro-1k-2 | F: AGCCTGTGCCACCGTTACTC<br>R: CCCGCGACCCAGAATGT     | 745               | 60      | Promote<br>r region<br>PCR |
| <i>HHEX</i> -exon1-1  | F: CCTGTGCCACCGTTACTCCA<br>R: GGGCGTGCGTGTAGTCATT   | 960               | 60      | exon1<br>PCR               |
| <i>HHEX</i> -exon1-2  | F: AGCCTCGTGTCTCCTACCG<br>R: GCTGCCATAAAGTCACATCCC  | 893               | 60      | exon1<br>PCR               |
| <i>HHEX</i> -exon23   | F: GCTACAGGGTCCTTTCTAATA<br>R: TTCTCCCAAAGATAACTGCT | 475               | 60      | exon2&<br>3 PCR            |
| <i>HHEX</i> -exon4    | F: GGGTTGGTCTTATCTGGC<br>R: GCTCTGAGATGGGTTTGG      | 984               | 60      | exon4<br>PCR               |
| <i>HHEX</i> -3'RACE   | GATTACGCCAAGCTTCCCAACTCCTCCTTC<br>ACCAGCCTCG        | 984               | 60      | exon4<br>PCR               |
| <i>HHEX</i> -5'RACE   | GATTACGCCAAGCTTCGAGGCTGGTGAAG<br>GAGGAGTTGGG        | 984               | 60      | exon4<br>PCR               |
