# Supplementary material for: Novel Haplotype in the HHEX Gene Promoter Associated with Body Length in Pigs
Source: MDPI journal article supplement (doi:10.3390/genes14020511), 2023-02-17
Supplement: s1 [file s1]

**Table S5.** Analysis of the transcription factor-binding sites of the SNP rs80934526A>G in the promoter sequence of the porcine *HHEX* gene.

| TF           | SEQUENCE           | SCORE      | Q-VALUE         | MATCHED SEQUENCE                        |
|--------------|--------------------|------------|-----------------|-----------------------------------------|
| TFAP2D       | rs80934526A        | 7.86179    | 0.0043          | TGCCTGGAGCCCC <u>T</u>                  |
| MLXIPL       | rs80934526A        | 11.2936    | 0.0017          | CCTGGAGCCCC <u>T</u> AGCGTGC            |
| THAP11       | rs80934526A        | 7.78947    | 0.00668         | CCTGGAGCCCC <u>T</u> AGCGTGCGGG         |
| ZBTB7A       | rs80934526A        | 10.7576    | 0.00349         | GAGCCCC <u>T</u> AGCGTG                 |
| ZBTB7A       | rs80934526A        | 11.5303    | 0.00398         | TGGAGCCCC <u>T</u> AGCG                 |
| ZNF423       | rs80934526A        | -1.57143   | 0.00205         | GAGCCCC <u>T</u> AGCGTGC                |
| FOXA2        | rs80934526A        | 9.19737    | 0.000551        | CGGGCCGGGGTGCCTGGAGCCCC <u>G</u> A      |
| SP4          | rs80934526A        | 6.28283    | 0.00147         | CGGGCCGGGGTGCCTGGAGCCCC <u>G</u>        |
| POU5F1       | rs80934526A        | 14.2105    | 0.000435        | GGCCGGGGTGCCTGGAGCCCC <u>G</u>          |
| BRD4         | rs80934526A        | 9.31169    | 0.00139         | GGCCGGGGTGCCTGGAGCCCC <u>G</u>          |
| EP300        | rs80934526A        | 7.44156    | 0.000966        | GGCCGGGGTGCCTGGAGCCCC <u>G</u> AGC      |
| MYB          | rs80934526A        | 9.96053    | 0.000485        | GCCGGGGTGCCTGGAGCCCC <u>G</u> AGCG      |
| FOXA2        | rs80934526G        | 9.98684    | 0.000551        | GCCGGGGTGCCTGGAGCCCC <u>G</u> AGCG      |
| MYC          | rs80934526G        | 8.44737    | 0.00205         | GCCGGGGTGCCTGGAGCCCC <u>G</u> A         |
| ZBTB17       | rs80934526G        | 9.72368    | 0.0066          | GCCGGGGTGCCTGGAGCCCC <u>G</u> AG        |
| BRD4         | rs80934526G        | 9.28571    | 0.00139         | CGGGGTGCCTGGAGCCCC <u>G</u> AGC         |
| POU5F1       | rs80934526G        | 9.09211    | 0.000783        | GGGGTGCCTGGAGCCCC <u>G</u> AGCG         |
| <b>HDAC2</b> | <b>rs80934526G</b> | <b>8.7</b> | <b>0.000889</b> | <b>GGGTGCCTGGAGCCCC<u>G</u>AGCGTGCG</b> |
| TFAP2C       | rs80934526G        | 10.9242    | 0.00715         | GGTGCCTGGAGCCCC <u>G</u>                |
| <b>HDAC2</b> | <b>rs80934526G</b> | <b>13</b>  | <b>0.000233</b> | <b>GTGCCTGGAGCCCC<u>G</u>AGCGTGCGGG</b> |
| HCFC1        | rs80934526G        | 7.03947    | 0.00742         | GTGCCTGGAGCCCC <u>G</u> AGCGTGC         |
| GTF2I        | rs80934526G        | 7.31579    | 0.00757         | GTGCCTGGAGCCCC <u>G</u> AGCGTGC         |
| UBTF         | rs80934526G        | 10.4737    | 0.00372         | CCTGGAGCCCC <u>G</u> AGCG               |
| REST         | <b>rs80934526G</b> | 9.07792    | 0.00109         | CCTGGAGCCCC <u>G</u> AGCGTGCGGGCAG      |
| POU5F1       | rs80934526G        | 11.5395    | 0.000532        | CTGGAGCCCC <u>G</u> AGCGTGCGGGC         |
| TFAP2D       | <b>rs80934526G</b> | 6.0102     | 0.00418         | TGGAGCCCC <u>G</u> AGCG                 |
| BRD4         | rs80934526G        | 7.97403    | 0.00183         | GGAGCCCC <u>G</u> AGCGTGCGGGCAG         |
| RELA         | rs80934526G        | 8.64474    | 0.00276         | AGCCCC <u>G</u> AGCGTGCGGGCAGC          |
| BRD3         | rs80934526G        | 10.6842    | 0.00327         | GCCCC <u>G</u> AGCGTGCGGG               |
| NCOR1        | rs80934526G        | 6.98485    | 0.00329         | GCCCC <u>G</u> AGCGTGCGGGCA             |
| SPI1         | rs80934526G        | 15.0658    | 0.000404        | CCCC <u>G</u> AGCGTGCGGGC               |
| RUNX1        | rs80934526G        | 10.2368    | 0.00258         | CCCC <u>G</u> AGCGTGCGGGC               |
| BRCA1        | rs80934526G        | 11.3026    | 0.0031          | CCCC <u>G</u> AGCGTGCGGG                |
| SPI1         | rs80934526G        | 10.8684    | 0.00234         | CCCC <u>G</u> AGCGTGCGGG                |
| SUMO2/SUMO3  | rs80934526G        | 10.6974    | 0.000992        | CCCC <u>G</u> AGCGTGCGGGC               |
| THAP1        | rs80934526G        | 9.52632    | 0.0062          | CCCC <u>G</u> AGCGTGCGG                 |
| MED1         | rs80934526G        | 9.32857    | 0.00618         | CCCC <u>G</u> AGCGTGCGGG                |
| RELA         | rs80934526G        | 8.78947    | 0.0091          | CCCC <u>G</u> AGCGTGCGG                 |
| SRF          | rs80934526G        | 7.65789    | 0.00255         | CCCC <u>G</u> AGCGTGCGGGCAGCTGG         |

|         |             |         |          |                                           |
|---------|-------------|---------|----------|-------------------------------------------|
| NRF1    | rs80934526G | 11.6711 | 0.00236  | CCC <u><b>G</b></u> AGCGTGCGGG            |
| SRC     | rs80934526G | 10.1579 | 0.00103  | CCC <u><b>G</b></u> AGCGTGCGGGCAGCTGGG    |
| ZNF143  | rs80934526G | 10.1184 | 0.00266  | CCC <u><b>G</b></u> AGCGTGCGGGCA          |
| POU5F1  | rs80934526G | 9.73684 | 0.000697 | CCC <u><b>G</b></u> AGCGTGCGGGCAGCTGGG    |
| SMARCA4 | rs80934526G | 9.77922 | 0.00119  | CCC <u><b>G</b></u> AGCGTGCGGGCAGCTGGGCAC |
| E2F1    | rs80934526G | 12.9079 | 0.00154  | CC <u><b>G</b></u> AGCGTGCGG              |
| NRF1    | rs80934526G | 11.8571 | 0.00214  | CC <u><b>G</b></u> AGCGTGCGG              |
| SPI1    | rs80934526G | 11.2105 | 0.00319  | CC <u><b>G</b></u> AGCGTGCGG              |
| FOXA2   | rs80934526G | 9.61842 | 0.000551 | CC <u><b>G</b></u> AGCGTGCGGGCAGCTGGGCACG |
| RELA    | rs80934526G | 8.4     | 0.00431  | CC <u><b>G</b></u> AGCGTGCGGGCAG          |
| RELA    | rs80934526G | 8.82895 | 0.00818  | CC <u><b>G</b></u> AGCGTGCGG              |
| BRD4    | rs80934526G | 7.18421 | 0.000896 | CC <u><b>G</b></u> AGCGTGCGGGCAGCTGGGCACG |
| HIF1A   | rs80934526G | 11.1327 | 0.00871  | CC <u><b>G</b></u> AGCGTGCGG              |
| ZBTB7B  | rs80934526G | 5.40816 | 0.00356  | CC <u><b>G</b></u> AGCGTGCGGGCAGCTGGGC    |
| NOTCH1  | rs80934526G | 7.27632 | 0.00769  | CC <u><b>G</b></u> AGCGTGCGGGCAGCTGGG     |
| SRC     | rs80934526G | 8       | 0.00158  | CC <u><b>G</b></u> AGCGTGCGGGCAGCTGGGC    |
| ETS1    | rs80934526G | 13.6053 | 0.000759 | C <u><b>G</b></u> AGCGTGCGGGCAGCTGGGCA    |
| SPI1    | rs80934526G | 11.7895 | 0.00349  | C <u><b>G</b></u> AGCGTGCGGG              |
| HIF1A   | rs80934526G | 12.3119 | 0.00389  | C <u><b>G</b></u> AGCGTGCGGG              |
| NRF1    | rs80934526G | 8.46053 | 0.0061   | C <u><b>G</b></u> AGCGTGCGGG              |
| NRF1    | rs80934526G | 9.17143 | 0.00315  | C <u><b>G</b></u> AGCGTGCGG               |
| RELA    | rs80934526G | 8.7     | 0.00749  | C <u><b>G</b></u> AGCGTGCGGG              |
| MZF1    | rs80934526G | 10.4079 | 0.0039   | <u><b>G</b></u> AGCGTGCGGGCAG             |
| EP300   | rs80934526G | 10.6842 | 0.00302  | <u><b>G</b></u> AGCGTGCGGGCAGCTGGGCACGGG  |
| POU5F1  | rs80934526G | 10.0526 | 0.000677 | <u><b>G</b></u> AGCGTGCGGGCAGCTGGGCAC     |
| HDAC2   | rs80934526G | 7.77143 | 0.00105  | <u><b>G</b></u> AGCGTGCGGGCAGCTGGGCACGGG  |

---

The mutation sites are highlighted in bold and underlined.
