# Supplementary material for: Novel Haplotype in the HHEX Gene Promoter Associated with Body Length in Pigs
Source: MDPI journal article supplement (doi:10.3390/genes14020511), 2023-02-17
Supplement: s1 [file s1]

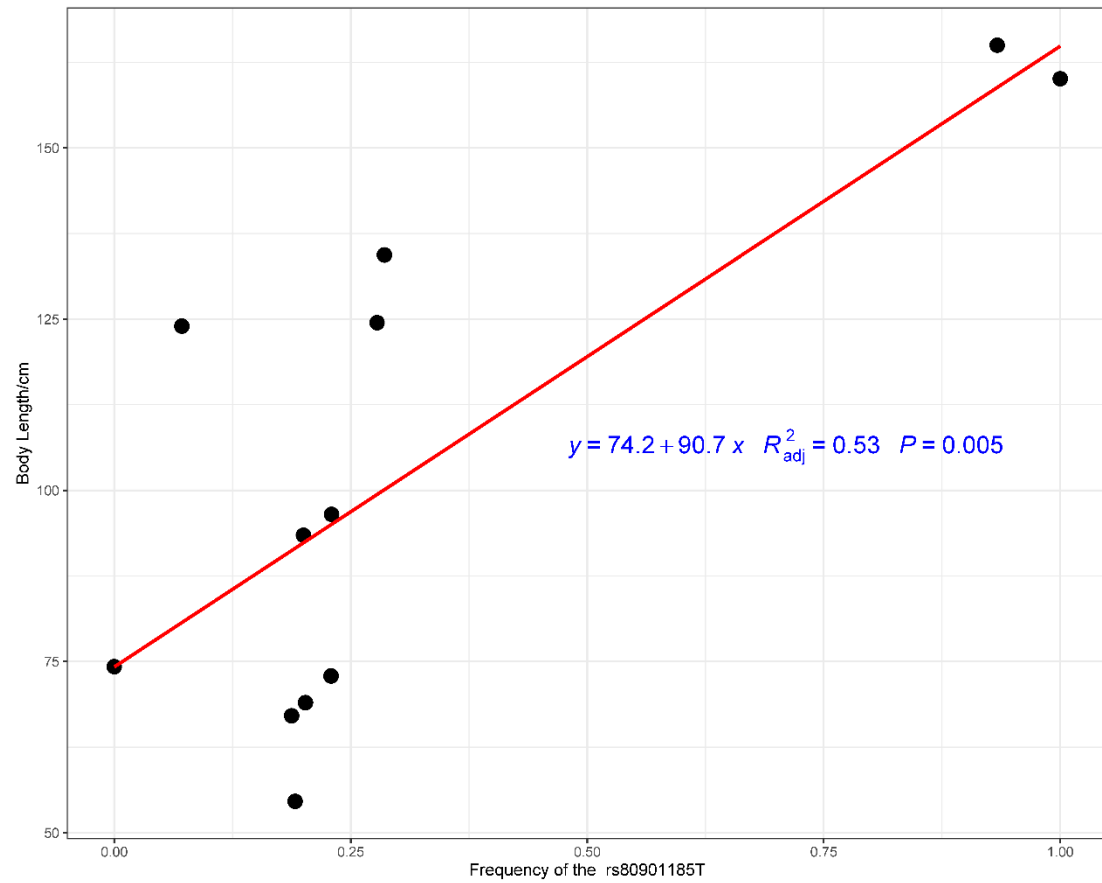

**Figure S1.** Linear regression analysis of the body length trait phenotype and gene frequency of the SNP rs80901185T.
