# Supplementary material for: Novel Haplotype in the HHEX Gene Promoter Associated with Body Length in Pigs
Source: MDPI journal article supplement (doi:10.3390/genes14020511), 2023-02-17
Supplement: s1 [file s1]

**Table S3.** Genotype and allele frequencies of the pig *HHEX* gene rs80901185 and rs80934526 polymorphisms in Yorkshire and Wuzhishan pigs.

| SNPs       | Breed     | Total<br>Number | Genotype, n, frequency |      |      | Allele, n,<br>frequency |      |
|------------|-----------|-----------------|------------------------|------|------|-------------------------|------|
|            |           |                 | CC                     | CT   | TT   | C                       | T    |
| rs80901185 | Wuzhishan | 24              | 15                     | 9    | 0    | 39                      | 9    |
|            | pigs      |                 | 0.63                   | 0.38 | 0.00 | 0.81                    | 0.19 |
|            | Yorkshire | 29              | 0                      | 0    | 29   | 0                       | 58   |
|            | pigs      |                 | 0.00                   | 0.00 | 1.00 | 0.00                    | 1.00 |
| rs80934526 |           |                 | GG                     | GA   | AA   | G                       | A    |
|            | Wuzhishan | 24              | 15                     | 9    | 0    | 39                      | 9    |
|            | pigs      |                 | 0.63                   | 0.38 | 0.00 | 0.81                    | 0.19 |
|            | Yorkshire | 29              | 0                      | 0    | 29   | 0                       | 58   |
|            | pigs      |                 | 0.00                   | 0.00 | 1.00 | 0.00                    | 1.00 |
