# Supplementary material for: Novel Haplotype in the HHEX Gene Promoter Associated with Body Length in Pigs
Source: MDPI journal article supplement (doi:10.3390/genes14020511), 2023-02-17
Supplement: s1 [file s1]

**Table S1.** Primer information of plasmid construction and RT-qPCR for porcine *HHEX* gene.

| Primer               | Primer sequence (5'-3')                                                                                              | Product Size (bp) | Tm (°C) | Usage                            |
|----------------------|----------------------------------------------------------------------------------------------------------------------|-------------------|---------|----------------------------------|
| pGL4-P1:<br>-1809/-1 | F: TAAGCTAGCATCAGGGCGTGCGTGTAG<br>R: TAAGCTAGCGGCCCCGCGCCGCGGCGCTAC                                                  | 1809              | 60      | Promoter vector construction     |
| pGL4-P1:<br>-1424/-1 | F: TAAGGTACCTGGGTTTGAAGTGTTAGTCC<br>R: TAAGCTAGCGGCCCCGCGCCGCGGCGCTAC                                                | 1424              | 60      | Promoter vector construction     |
| pGL4-P1:<br>-1094/-1 | F: TAAGGTACCGGACCTTAGCAGAAACCG<br>R: TAAGCTAGCGGCCCCGCGCCGCGGCGCTAC                                                  | 1094              | 60      | Promoter vector construction     |
| pGL4-P1:<br>-586/-1  | F: TAAGGTACCGCCTGTGCCACCGTTACTC<br>R: TAAGCTAGCGGCCCCGCGCCGCGGCGCTAC                                                 | 586               | 60      | Promoter vector construction     |
| pGL4-TA              | F: TAAGGTACCGGTGGAGGTGTGTTCCCACC<br>R: TAAGCTAGCTGCGCCCCCGTGCCCAGCTG                                                 | 189               | 60      | TA haplotype vector construction |
| pGL4-CG              | F: TAAGGTACCGGTGGAGGTGTGTTCCCACC<br>R: TAAGCTAGCTGCGCCCCCGTGCCCAGCTG                                                 | 189               | 60      | CG haplotype vector construction |
| pGL4-TG              | F:TAAGGTACCGGTGGAGGTGTGTTCCCACC<br>GGGGCTACAG <b><u>TC</u></b> GCTTGAATCCGCCTTCC<br>R: TAAGCTAGCTGCGCCCCCGTGCCCAGCTG | 189               | 60      | TG haplotype vector construction |
| pGL4-CA              | F: TAAGGTACCGGTGGAGGTGTGTTCCCACC<br>R:TAAGCTAGCGCGCCCCCGTGCCCAGCTGC<br>CCGCACGCT <b><u>T</u></b> GGGGCTCCAGGCAC      | 189               | 60      | CA haplotype vector construction |
| HHEX                 | F: CGCCTTCTCGCACCCT<br>R: GGCCGCCTTTCCTTTT                                                                           | 191               | 60      | RT-qPCR                          |
| $\beta$ -actin       | F: GCCAACCGTGAGAAGATGACT<br>R: GTGACCCCATCCCCAGAGT                                                                   | 140               | 60      | RT-qPCR                          |

The mutation sites are highlighted in bold and underlined.
